# Supplementary material for: Cognitive Functioning and Nail Salon Occupational Exposure among Vietnamese Immigrant Women in Northern California
Source: Int J Environ Res Public Health. 2022 Apr 12;19(8):4634. doi: 10.3390/ijerph19084634 (PMC9032223; doi:10.3390/ijerph19084634)
Supplement: Supplementary file 1 [file ijerph-19-04634-s001.zip › ijerph-1596235-supplementary.pdf]

**Supplemental Table S1. Characteristics of Current full-time, Former, and Part-time Nail Salon Worker Participants.**

|                                                  | <b>Current<br/>full-time<br/>Nail Salon<br/>Worker<br/>(n=136)</b> | <b>Former<br/>Nail Salon<br/>Worker<br/>(n=14)</b> | <b>Part-time<br/>Nail Salon<br/>Worker<sup>a</sup><br/>(n=5)</b> | <b>Total<br/>(n = 155)</b> | <b>p-value<sup>a</sup></b> |
|--------------------------------------------------|--------------------------------------------------------------------|----------------------------------------------------|------------------------------------------------------------------|----------------------------|----------------------------|
|                                                  | <b>N(%)</b>                                                        | <b>N(%)</b>                                        | <b>N(%)</b>                                                      | <b>N(%)</b>                |                            |
| <b>Education</b>                                 |                                                                    |                                                    |                                                                  |                            | 0.842                      |
| Elementary/middle school                         | 37 (28.0%)                                                         | 5 (35.7%)                                          | 2 (40.0%)                                                        | 44 (29.1%)                 |                            |
| High school                                      | 55 (41.7%)                                                         | 5 (35.7%)                                          | 1 (20.0%)                                                        | 61 (40.4%)                 |                            |
| Technical school/Some college                    | 30 (22.7%)                                                         | 4 (28.6%)                                          | 2 (40.0%)                                                        | 36 (23.8%)                 |                            |
| Bachelor/Master/Ph.D/MD/JD etc                   | 10 (7.6%)                                                          | 0 (0.0%)                                           | 0 (0.0%)                                                         | 10 (6.6%)                  |                            |
| <b>Marriage status</b>                           |                                                                    |                                                    |                                                                  |                            | 0.096                      |
| Single                                           | 8 (6.1%)                                                           | 2 (14.3%)                                          | 0 (0.0%)                                                         | 10 (6.6%)                  |                            |
| Married                                          | 82 (62.1%)                                                         | 7 (50.0%)                                          | 1 (20.0%)                                                        | 90 (59.6%)                 |                            |
| Divorced                                         | 19 (14.4%)                                                         | 2 (14.3%)                                          | 1 (20.0%)                                                        | 22 (14.6%)                 |                            |
| Widow                                            | 12 (9.1%)                                                          | 3 (21.4%)                                          | 2 (40.0%)                                                        | 17 (11.3%)                 |                            |
| Domestic partner                                 | 11 (8.3%)                                                          | 0 (0.0%)                                           | 1 (20.0%)                                                        | 12 (8.0%)                  |                            |
| <b>Ability to speak English</b>                  |                                                                    |                                                    |                                                                  |                            | 0.526                      |
| Little                                           | 9 (6.8%)                                                           | 0 (0.0%)                                           | 0 (0.0%)                                                         | 9 (6.0%)                   |                            |
| Average                                          | 72 (54.55%)                                                        | 10 (71.4%)                                         | 2 (40.0%)                                                        | 84 (55.6%)                 |                            |
| Good/Great                                       | 51 (38.6%)                                                         | 4 (28.6%)                                          | 3 (60.0%)                                                        | 58 (38.4%)                 |                            |
|                                                  | <b>Mean (±SD)</b>                                                  | <b>Mean (±SD)</b>                                  | <b>Mean (±SD)</b>                                                | <b>Mean (±SD)</b>          |                            |
| <b>Age</b>                                       | 57.1 (±5.9)                                                        | 58.9 (±6.5)                                        | 59.4 (±7.3)                                                      | 57.4 (±6.0)                | 0.462                      |
| <b>MoCA score</b>                                | 17.7 (±4.4)                                                        | 16.8 (±3.1)                                        | 19.0 (±5.8)                                                      | 17.6 (±4.3)                | 0.627                      |
| <b>Education-adjusted MoCA score<sup>b</sup></b> | 18.0 (±4.3)                                                        | 17.3 (±3.1)                                        | 19.6 (±5.2)                                                      | 18.0 (±4.2)                | 0.603                      |
| <b>CES-D (Depression scale)</b>                  | 16.3 (±9.9)                                                        | 19.3 (±9.1)                                        | 17.0 (±8.8)                                                      | 16.6 (±9.8)                | 0.370                      |

a. P-values of comparing groups from Kruskal-Wallis tests for continuous and ordinal variables, and  $\chi^2$  test (or Fisher exact test) for categorical variables.

b. If participant did not finish high school, the education-adjusted MoCA score = MoCA+1; otherwise education-adjusted MoCA score = MoCA.

**Supplemental Table S2. Summary of toxin-exposure of Current, Former, and Part-time Nail Salon Worker Participants. Raw means (standard deviations) and counts (proportions) are reported.**

|                                                        | <b>Current full-time Nail Salon Worker<br/>(n=136)</b> |                                            | <b>Former Nail Salon Worker<br/>(n=14)</b> |                                                | <b>Part-time Nail Salon Worker<sup>a</sup><br/>(n=5)</b> |                                                |                                 |
|--------------------------------------------------------|--------------------------------------------------------|--------------------------------------------|--------------------------------------------|------------------------------------------------|----------------------------------------------------------|------------------------------------------------|---------------------------------|
|                                                        | <b>Observed<br/>n</b>                                  | <b>Mean (±SD)<br/>(Range)<br/>or N (%)</b> | <b>Observed<br/>n</b>                      | <b>Mean<br/>(±SD)<br/>(Range)<br/>or N (%)</b> | <b>Observed<br/>n</b>                                    | <b>Mean<br/>(±SD)<br/>(Range)<br/>or N (%)</b> | <b>p-<br/>value<sup>b</sup></b> |
| <b>Years<br/>working in<br/>current nail<br/>salon</b> | 122                                                    | 6.3 (±6.7)<br>(0.04 - 27)                  | 8                                          | 3.3<br>(±3.5)<br>(0.5 - 11)                    | 3                                                        | 10.7<br>(±6.7)<br>(3 - 15)                     | 0.229                           |
| <b>Hours<br/>worked per<br/>week</b>                   | 130                                                    | 33.5 (±14.6)<br>(4 - 70)                   | 9                                          | 33.0<br>(±18.7)<br>(1 - 70)                    | 5                                                        | 16.8<br>(±14.2)<br>(3 - 40)                    | 0.055                           |
| <b>Exposure<br/>Index<sup>a</sup></b>                  | 118                                                    | 209.4 (±262.9)<br>(1.25 – 1500)            | 4                                          | 100.0<br>(±120.0)<br>(40 – 280)                | 3                                                        | 229.0<br>(±321.3)<br>(42 – 600)                | 0.769                           |
| <b>Environment<br/>in current<br/>workplace</b>        |                                                        |                                            |                                            |                                                |                                                          |                                                |                                 |
| Manitable                                              | 124                                                    | 5.1 (±2.5)<br>(0 - 12)                     | 11                                         | 4.4<br>(±1.5)<br>(1 - 6)                       | 5                                                        | 3.6<br>(±1.7)<br>(1 - 5)                       | 0.268                           |
| Pedichair                                              | 130                                                    | 5.9 (±3.3)<br>(0 - 15)                     | 10                                         | 3.6<br>(±1.3)<br>(1 - 5)                       | 5                                                        | 5.0<br>(±2.4)<br>(3 - 9)                       | 0.040                           |
| Lunch area                                             | 128                                                    | 112 (87.5%)                                | 12                                         | 9<br>(75.0%)                                   | 5                                                        | 5<br>(100.0%)                                  | 0.370                           |
| Eating at<br>the right time<br>every day               | 104                                                    | 43 (41.4%)                                 | 12                                         | 5<br>(41.7%)                                   | 5                                                        | 1<br>(20.0%)                                   | 0.773                           |
| Front door                                             | 127                                                    | 116 (91.3%)                                | 12                                         | 11<br>(91.7%)                                  | 4                                                        | 3<br>(75.0%)                                   | 0.378                           |
| Back door                                              | 126                                                    | 46 (36.5%)                                 | 11                                         | 4<br>(36.4%)                                   | 5                                                        | 2<br>(40.0%)                                   | 0.999                           |
| Table vent                                             | 115                                                    | 69 (53.1%)                                 | 11                                         | 8 (6.2%)                                       | 4                                                        | 3<br>(75.0%)                                   | 0.669                           |
| Table fan                                              | 123                                                    | 111 (90.2%)                                | 11                                         | 10<br>(90.9%)                                  | 5                                                        | 4<br>(80.0%)                                   | 0.605                           |

|                                               |     |              |    |                |   |               |       |
|-----------------------------------------------|-----|--------------|----|----------------|---|---------------|-------|
| Ceiling fan                                   | 126 | 35 (27.8%)   | 11 | 4<br>(36.4%)   | 4 | 1<br>(25.0%)  | 0.792 |
| Air condition                                 | 123 | 108 (87.8%)  | 9  | 8<br>(88.9%)   | 5 | 5<br>(100.0%) | 0.999 |
| Stationary vent                               | 111 | 61 (55.0%)   | 10 | 5<br>(50.0%)   | 4 | 1<br>(25.0%)  | 0.553 |
| Filtration                                    | 115 | 44 (38.3%)   | 10 | 5<br>(50.0%)   | 4 | 2<br>(50.0%)  | 0.588 |
| <b>Self-rated quality of environment</b>      |     |              |    |                |   |               | 0.385 |
| Horrible                                      | 131 | 2 (1.5%)     | 13 | 1 (7.7%)       | 5 | 0 (0.0%)      |       |
| Bad                                           | 131 | 11 (8.4%)    | 13 | 2<br>(15.4%)   | 5 | 0 (0.0%)      |       |
| Normal                                        | 131 | 55 (42.0%)   | 13 | 5<br>(38.5%)   | 5 | 1<br>(20.0%)  |       |
| Good                                          | 131 | 58 (44.3%)   | 13 | 4<br>(30.8%)   | 5 | 4<br>(80.0%)  |       |
| Great                                         | 131 | 5 (3.8%)     | 13 | 1 (7.7%)       | 5 | 0 (0.0%)      |       |
| <b>Work position</b>                          |     |              |    |                |   |               | 0.863 |
| Staff                                         | 132 | 111 (84.1%)  | 12 | 11<br>(91.7%)  | 5 | 5<br>(100.0%) |       |
| Owner                                         | 132 | 21 (15.9%)   | 12 | 1 (8.3%)       | 5 | 0 (0.0%)      |       |
| <b>Service that current workplace offered</b> |     |              |    |                |   |               |       |
| Pedi                                          | 130 | 130 (100.0%) | 12 | 12<br>(100.0%) | 4 | 4<br>(100.0%) | 1.000 |
| Mani                                          | 128 | 128 (100.0%) | 12 | 12<br>(100.0%) | 5 | 5<br>(100.0%) | 1.000 |
| Silk                                          | 119 | 54 (45.4%)   | 9  | 7<br>(77.8%)   | 5 | 1<br>(20.0%)  | 0.089 |
| Gel                                           | 131 | 125 (95.4%)  | 12 | 11<br>(91.7%)  | 5 | 5<br>(100.0%) | 0.582 |
| Acrylics                                      | 130 | 118 (90.8%)  | 12 | 12<br>(100.0%) | 5 | 5<br>(100.0%) | 0.740 |
| Extra                                         | 131 | 100 (76.3%)  | 12 | 7<br>(58.3%)   | 5 | 4<br>(80.0%)  | 0.319 |
| <b>Service that participants offered</b>      |     |              |    |                |   |               |       |
| Pedi                                          | 131 | 127 (96.9%)  | 13 | 12<br>(92.3%)  | 5 | 5<br>(100.0%) | 0.480 |
| Mani                                          | 130 | 128 (96.2%)  | 13 | 12             | 5 | 5             | 0.547 |

|               |     |            |    |              |   |              |        |
|---------------|-----|------------|----|--------------|---|--------------|--------|
|               |     |            |    | (92.3%)      |   | (100.0%)     |        |
| Silk          | 121 | 30 (24.8%) | 13 | 2<br>(15.4%) | 5 | 0 (0.0%)     | 0.515  |
| Gel           | 129 | 99 (76.7%) | 13 | 4<br>(30.8%) | 5 | 1<br>(20.0%) | <0.001 |
| Acrylics      | 126 | 63 (50.0%) | 13 | 5<br>(38.5%) | 5 | 0 (0.0%)     | 0.073  |
| Extra         | 115 | 47 (40.9%) | 13 | 3<br>(23.1%) | 4 | 1<br>(25.0%) | 0.470  |
| <b>Mask</b>   |     |            |    |              |   |              | 0.496  |
| Never         | 132 | 28 (21.2%) | 12 | 3<br>(25.0%) | 5 | 2<br>(40.0%) |        |
| Rarely        | 132 | 16 (11.4%) | 12 | 0 (0.0%)     | 5 | 1<br>(20.0%) |        |
| Often         | 132 | 43 (32.9%) | 12 | 4<br>(33.3%) | 5 | 2<br>(40.0%) |        |
| Always        | 132 | 45 (33.6%) | 12 | 5<br>(41.7%) | 5 | 0 (0.0%)     |        |
| <b>Gloves</b> |     |            |    |              |   |              | 0.257  |
| Never         | 131 | 7 (5.3%)   | 12 | 2<br>(16.7%) | 5 | 0 (0.0%)     |        |
| Rarely        | 131 | 4 (3.1%)   | 12 | 0 (0.0%)     | 5 | 0 (0.0%)     |        |
| Often         | 131 | 27 (20.6%) | 12 | 3<br>(25.0%) | 5 | 3<br>(60.0%) |        |
| Always        | 131 | 93 (71.0%) | 12 | 7<br>(58.3%) | 5 | 2<br>(40.0%) |        |

a. Exposure index = (years working in current nail salon) x (hours worked per week).

**Supplemental Table S3a. Sensitivity analysis on association between MOCA and factors using multiple linear regression in all participants, with Huber-White robust standard error estimator for potential heterogenous variances (n = 269).**

|                                            | Estimate (95% CI)    | p-value          |
|--------------------------------------------|----------------------|------------------|
| <b>Education</b>                           |                      |                  |
| Elementary/middle school                   | Reference            |                  |
| High school                                | 2.92 (1.73, 4.10)    | <b>&lt;0.001</b> |
| Technical school/Some college              | 4.61 (3.13, 6.09)    | <b>&lt;0.001</b> |
| Bachelor/Master/Ph.D/MD/JD etc             | 6.24 (4.57, 7.92)    | <b>&lt;0.001</b> |
| <b>Live alone</b>                          |                      |                  |
| Yes                                        | Reference            |                  |
| No                                         | 0.02 (-0.98, 1.02)   | 0.975            |
| <b>Ability to speak</b>                    |                      |                  |
| Little                                     | Reference            |                  |
| Average                                    | 1.35 (-0.32, 3.03)   | 0.113            |
| Good/Great                                 | 1.35 (-0.60, 3.30)   | 0.173            |
| <b>Age (in years)</b>                      | -0.07 (-0.15, 0.02)  | 0.119            |
| <b>Exposure index (in 100)<sup>a</sup></b> | -0.29 (-0.49, -0.09) | <b>0.004</b>     |

a. Exposure index = (years working in current nail salon) x (hours worked per week). For non-nail workers, exposure index = 0.

**Supplemental Table S3b. Sensitivity analysis on association between MOCA and factors using multiple linear regression in all participants, after multiple imputations<sup>b</sup> for missing variables (n = 300).**

|                                            | Estimate (95% CI)    | p-value          |
|--------------------------------------------|----------------------|------------------|
| <b>Education</b>                           |                      |                  |
| Elementary/middle school                   | Reference            |                  |
| High school                                | 2.91 (1.72, 4.10)    | <b>&lt;0.001</b> |
| Technical school/Some college              | 4.61 (3.19, 6.03)    | <b>&lt;0.001</b> |
| Bachelor/Master/Ph.D/MD/JD etc             | 6.25 (4.52, 7.98)    | <b>&lt;0.001</b> |
| <b>Live alone</b>                          |                      |                  |
| Yes                                        | Reference            |                  |
| No                                         | 0.02 (-0.98, 1.02)   | 0.966            |
| <b>Ability to speak</b>                    |                      |                  |
| Little                                     | Reference            |                  |
| Average                                    | 1.33 (-0.27, 2.92)   | 0.104            |
| Good/Great                                 | 1.35 (-0.45, 3.14)   | 0.142            |
| <b>Age (in years)</b>                      | -0.06 (-0.14, 0.01)  | 0.097            |
| <b>Exposure index (in 100)<sup>a</sup></b> | -0.29 (-0.53, -0.05) | <b>0.018</b>     |

a. Exposure index = (years working in current nail salon) x (hours worked per week). For non-nail workers, exposure index = 0.

- b. Fifty imputed values for each missing variable were generated using MICE (multiple imputation chained equations)

**Supplemental Table S3c. Sensitivity analysis on association between MOCA and factors using multiple linear regression in nail salon workers only (n = 125).**

|                                            | Estimate (95% CI)   | p-value |
|--------------------------------------------|---------------------|---------|
| <b>Education</b>                           |                     |         |
| Elementary/middle school                   | Reference           |         |
| High school                                | 3.23 (1.47, 5.00)   | <0.001  |
| Technical school/Some college              | 5.75 (3.58, 7.92)   | <0.001  |
| Bachelor/Master/Ph.D/MD/JD etc             | 6.23 (3.19, 9.26)   | <0.001  |
| <b>Live alone</b>                          |                     |         |
| Yes                                        | Reference           |         |
| No                                         | 0.16 (-1.46, 1.79)  | 0.842   |
| <b>Ability to speak</b>                    |                     |         |
| Little                                     | Reference           |         |
| Average                                    | -0.55 (-3.42, 2.33) | 0.709   |
| Good/Great                                 | -1.03 (-4.13, 2.06) | 0.512   |
| <b>Age (in years)</b>                      | -0.06 (-0.18, 0.07) | 0.359   |
| <b>Exposure index (in 100)<sup>a</sup></b> | -0.19 (-0.48, 0.10) | 0.204   |

a. Exposure index = (years working in current nail salon) x (hours worked per week).

**Supplemental Table S3d. Sensitivity analysis on association between MOCA and factors using multiple linear regression in current full-time nail salon workers only (n = 118).**

|                                            | Estimate (95% CI)   | p-value |
|--------------------------------------------|---------------------|---------|
| <b>Education</b>                           |                     |         |
| Elementary/middle school                   | Reference           |         |
| High school                                | 3.28 (1.49, 5.07)   | <0.001  |
| Technical school/Some college              | 5.44 (3.22, 7.67)   | <0.001  |
| Bachelor/Master/Ph.D/MD/JD etc             | 6.21 (3.18, 9.23)   | <0.001  |
| <b>Live alone</b>                          |                     |         |
| Yes                                        | Reference           |         |
| No                                         | 0.27 (-1.38, 1.93)  | 0.746   |
| <b>Ability to speak</b>                    |                     |         |
| Little                                     | Reference           |         |
| Average                                    | -0.36 (-3.23, 2.50) | 0.803   |
| Good/Great                                 | -1.14 (-4.23, 1.95) | 0.469   |
| <b>Age (in years)</b>                      | -0.09 (-0.22, 0.04) | 0.180   |
| <b>Exposure index (in 100)<sup>a</sup></b> | -0.22 (-0.51, 0.08) | 0.152   |

a. Exposure index = (years working in current nail salon) x (hours worked per week). For non-nail workers, exposure index = 0.
